# Supplementary material for: A dual identification strategy based on padlock ligation and CRISPR/Cas14a for highly specific detection of BRAF V600E mutation in clinical samples
Source: Royal Society of Chemistry journal article supplement (doi:10.1039/d2ay00319h), 2022-01-01
Supplement: d2ay00319h1.pdf [file d2ay00319h1.pdf]

## Supporting information

Weicheng Shi<sup>a,1</sup>, Yao Gong<sup>a,1</sup>, Decai Zhang<sup>a</sup>, Tiantian Yang<sup>a</sup>, Ming Yi<sup>a</sup>, Jingyi Tan<sup>a</sup>,  
Shijia Ding<sup>b</sup>, Wei Cheng<sup>a,\*</sup>

<sup>a</sup> The Center for Clinical Molecular Medical detection, The First

Affiliated Hospital of Chongqing Medical University, Chongqing 400016,

PR China

<sup>b</sup> Key Laboratory of Clinical Laboratory Diagnostics (Ministry of

Education), College of Laboratory Medicine, Chongqing Medical

University, Chongqing, 400016, China

\* Corresponding author. E-mail address: chengwei@hospital.cqmu.edu.cn (W. Cheng).

## Instruments

ARMS-PCR were carried on LightCycler® 480 Instrument II (Rothe, Co., Ltd., Germany) and Applied Biosystems™ 7500 (Thermo Fisher Scientific, Co., Ltd., Shanghai, China). The gel electrophoresis and gel image were performed on DYY-6C electrophoresis analyzer (Liuyi Instrument Company, China) and Quantum ST4-1100, respectively. The fluorescence analysis were carried on FS5 Spectrofluorometer(Edinburgh Instruments Ltd.)

**Table S1.** Sequences of targets and probes used in this assay.

| DNA                               | Sequence (5'-3')                                                                                                                                                                                                                          |
|-----------------------------------|-------------------------------------------------------------------------------------------------------------------------------------------------------------------------------------------------------------------------------------------|
| BRAF<br>V600E<br>Wild target      | GATGGGACCCACTCCATCGAGATTTCCTGTAGCTAGACCAAATCACCTATTT<br>TTACTGT                                                                                                                                                                           |
| BRAF<br>V600E<br>Mutant<br>target | GATGGGACCCACTCCATCGAGATTTCCTGTAGCTAGACCAAATCACCTATTT<br>TTACTGT                                                                                                                                                                           |
| K601E<br>Mutant<br>target         | GATGGGACCCACTCCATCGAGATTCCACTGTAGCTAGACCAAATCACCTATTT<br>TTACTGT                                                                                                                                                                          |
| V600R<br>Mutant<br>target         | GATGGGACCCACTCCATCGAGATTTCCTTGTAGCTAGACCAAATCACCTATTT<br>TTACTGT                                                                                                                                                                          |
| V600K<br>Mutant<br>target         | GATGGGACCCACTCCATCGAGATTTCCTTGTAGCTAGACCAAATCACCTATTT<br>TTACTGT                                                                                                                                                                          |
| Padlock<br>probe                  | 5p4-<br>GACATCGATCTGGTTTTCTCATGCTTCTTCGGTGCCCATCATTGATTCTGC<br>AGTTGCATTGAGGTAGCTCTAAAGA                                                                                                                                                  |
| Primer                            | GATGGGCACCGAAGAAGCAT                                                                                                                                                                                                                      |
| MB                                | DYBCY1-CGCACCCTAGCTACAGAGAAATCTCGAGGTGCG -FAM                                                                                                                                                                                             |
| FQ                                | DYBCY1-TTTTTTTTTTTT- -FAM                                                                                                                                                                                                                 |
| sgRNA                             | CUUCACUGAUAAGUGGAGAACCGCUUCACCAAAGCUGUCCCUAGGGGAU<br>UAGAACUUGAGUGAAGGUGGGCUGCUUGCAUCAGCCUAAUGUCGAGAAGUG<br>CUUUCUUCGAAAGUAACCCUCGAAACAAUUCUUUUUCCUCUCCAAUUCU<br>GCACAAGAAAGUUGCAGAACCCGAAUAGACGAAUGAAGGAAUGCAACCUAG<br>CUACAGAGAAAUCUCGA |

The mutation sites are in bold orange. The spacer sequences of crRNA are in bold red.

## DNA extraction

### AmoyDx@FFPE DNA Kit

180 µL Buffer DTL and 20 µL proteinase K solution was added in samples, and heated up to 56°C for 1 hour after shaking and mixing. Next, 10 µL Buffer DES were added into the mixture and heat for 1 hour in constant temperature incubator. Then, 200 µL Buffer DTB and 200 µL absolute ethyl alcohol were mixed with the solution and transferred the solution into a DNA adsorption column followed by centrifuging (10000×g 1 min). After discarding filtrate, 600 µL Buffer DW1 was added into adsorption column to wash by centrifuging. Repeat the washing step by using 600 µL Buffer DW2. The DNA was eluted in 100µL Buffer DTE by centrifuging at 13000 g for 1 minute.

### The cT value of the detected samples

**Table S2.** The cT value of the detected samples by ARMS-PCR

| Sample code | CT value<br>(Malignant) | Sample code | CT value<br>(Benign) |
|-------------|-------------------------|-------------|----------------------|
| 1           | 15.62                   | 19          | Undetermined         |
| 2           | 9.84                    | 20          | Undetermined         |
| 3           | 23.56                   | 21          | Undetermined         |
| 4           | 8.25                    | 22          | Undetermined         |
| 5           | 12.65                   | 23          | Undetermined         |
| 6           | 8.62                    |             |                      |
| 7           | 13.59                   |             |                      |
| 8           | 22.0                    |             |                      |
| 9           | 24.15                   |             |                      |
| 10          | 16.62                   |             |                      |
| 11          | 11.50                   |             |                      |
| 12          | 7.56                    |             |                      |
| 13          | 18.69                   |             |                      |
| 14          | 8.84                    |             |                      |
| 15          | 19.65                   |             |                      |
| 16          | 13.54                   |             |                      |
| 17          | 14.83                   |             |                      |
| 18          | 7.98                    |             |                      |

**Table S3** Comprehensive comparison of other CRISPR-based analytical performance

| Signaling strategy | Detection method | Target Type | Detection limit | disease/pathogen    | References |
|--------------------|------------------|-------------|-----------------|---------------------|------------|
| Cas9 + NASBA       | Colorimetric     | DNA         | 1 fM            | Zika virus          | 1          |
| dCas9 +PCR         | Colorimetric     | DNA         | 82 aM           | African Swine Fever | 2          |
| Cas12a+ RPA        | Fluorescence     | RNA         | 10              | SARS-CoV-2          | 3          |

|                  |                          |       |              |                        |              |
|------------------|--------------------------|-------|--------------|------------------------|--------------|
|                  |                          |       | pM           |                        |              |
| Cas12b+LAMP      | Fluorescence             | DNA   | 1pM          | Several viruses        | 4            |
| Cas13a<br>+EXPAR | Electrochemiluminescence | miRNA | 1 fM         | Various tumor<br>cells | 5            |
| Cas14a+RCA       | Fluorescence             | SNV   | 0.30<br>7 fM | BRAF V600E             | This<br>work |

**Table S4.** The reproducibility of the developed biosensor of inter-assay and intra-assay in five parallel assays respectively (CmtDNA=10pmol)

| Group       | Parallel tests (a.u.)                      | Average<br>(a.u.) | SD      | RSD<br>(%) |
|-------------|--------------------------------------------|-------------------|---------|------------|
| Inter-assay | 169481 ; 161415 ; 153825 ; 155884 ; 165123 | 161145            | 5773.16 | 3.58%      |
| Intra-assay | 167452 ; 167415 ; 168625 ; 163022 ; 162565 | 165815            | 2509.95 | 1.51%      |

- [1] Pardee K, Green A A, Takahashi M K, et al. Rapid, low-cost detection of Zika virus using programmable biomolecular components[J]. Cell, 2016, 165(5): 1255-1266.
- [2] Wang X, Xiong E, Tian T, et al. Clustered regularly interspaced short palindromic repeats/Cas9-mediated lateral flow nucleic acid assay[J]. ACS nano, 2020, 14(2): 2497-2508.
- [3] Lucia C, Federico P B, Alejandra G C. An ultrasensitive, rapid, and portable coronavirus SARS-CoV-2 sequence detection method based on CRISPR-Cas12[J]. BioRxiv, 2020.
- [4] Li L, Li S, Wu N, et al. HOLMESv2: a CRISPR-Cas12b-assisted platform for nucleic acid detection and DNA methylation quantitation[J]. ACS synthetic biology, 2019, 8(10): 2228-2237.
- [5] Zhou T, Huang R, Huang M, et al. CRISPR/Cas13a powered portable electrochemiluminescence chip for ultrasensitive and specific MiRNA detection[J]. Advanced science, 2020, 7(13): 1903661.
